# Supplementary material for: Competing ParA Structures Space Bacterial Plasmids Equally over the Nucleoid
Source: PubMed Central journal article supplement (PMC4270457; doi:10.1371/journal.pcbi.1004009), 2014-12-18

### S3.

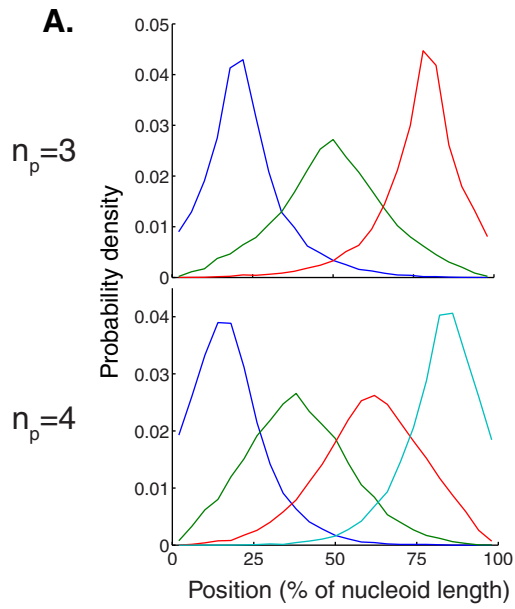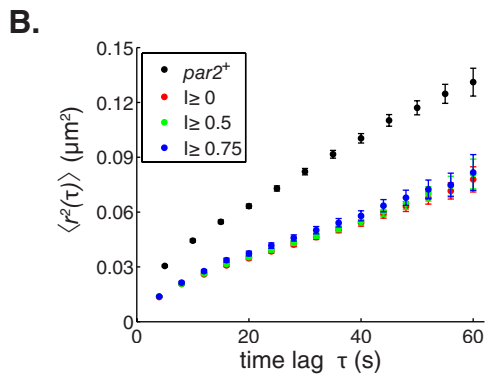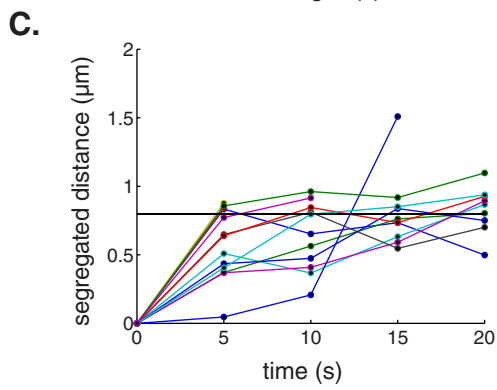

Supplement: pcbi.1004009.s003.pdf [file pcbi.1004009.s003.pdf]
