# Supplementary material for: Competing ParA Structures Space Bacterial Plasmids Equally over the Nucleoid
Source: PubMed Central journal article supplement (PMC4270457; doi:10.1371/journal.pcbi.1004009), 2014-12-18

# S5.

**A.**

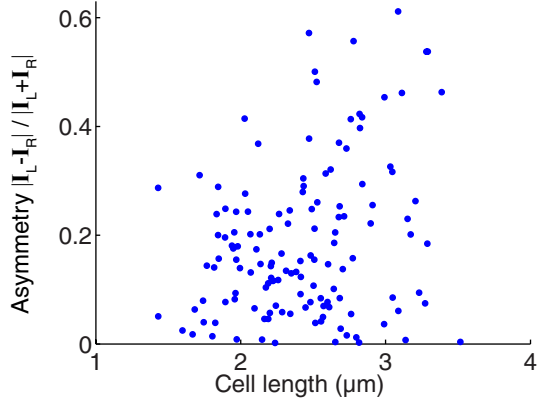

**B.**

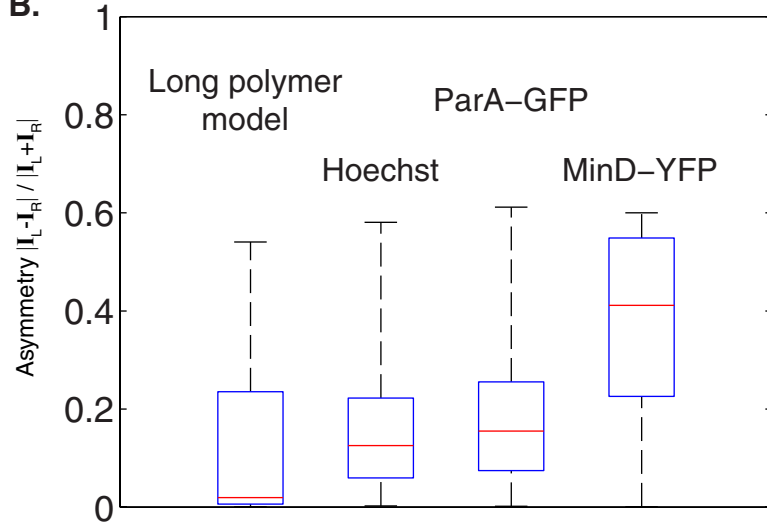

**C.**

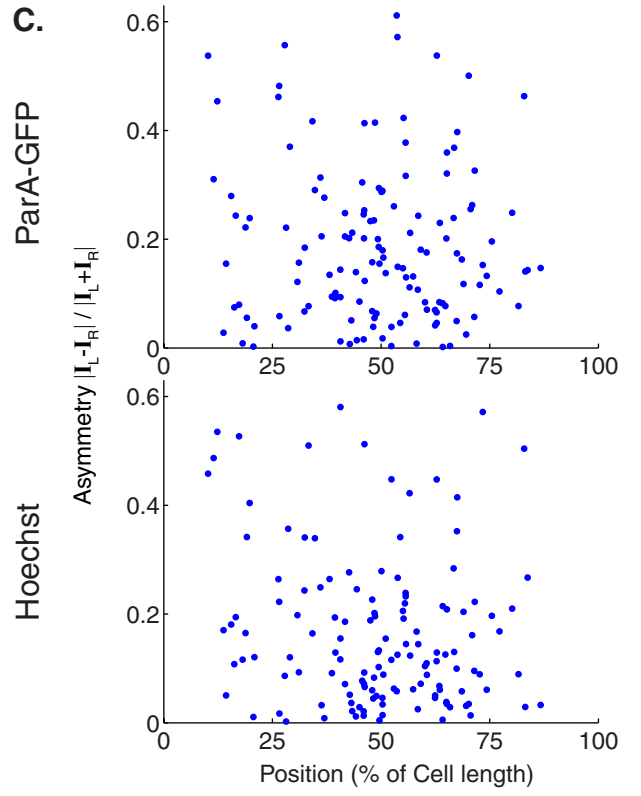

Supplement: pcbi.1004009.s005.pdf [file pcbi.1004009.s005.pdf]
