# Supplementary material for: Competing ParA Structures Space Bacterial Plasmids Equally over the Nucleoid
Source: PubMed Central journal article supplement (PMC4270457; doi:10.1371/journal.pcbi.1004009), 2014-12-18

**S6.****A.****WT****Nal**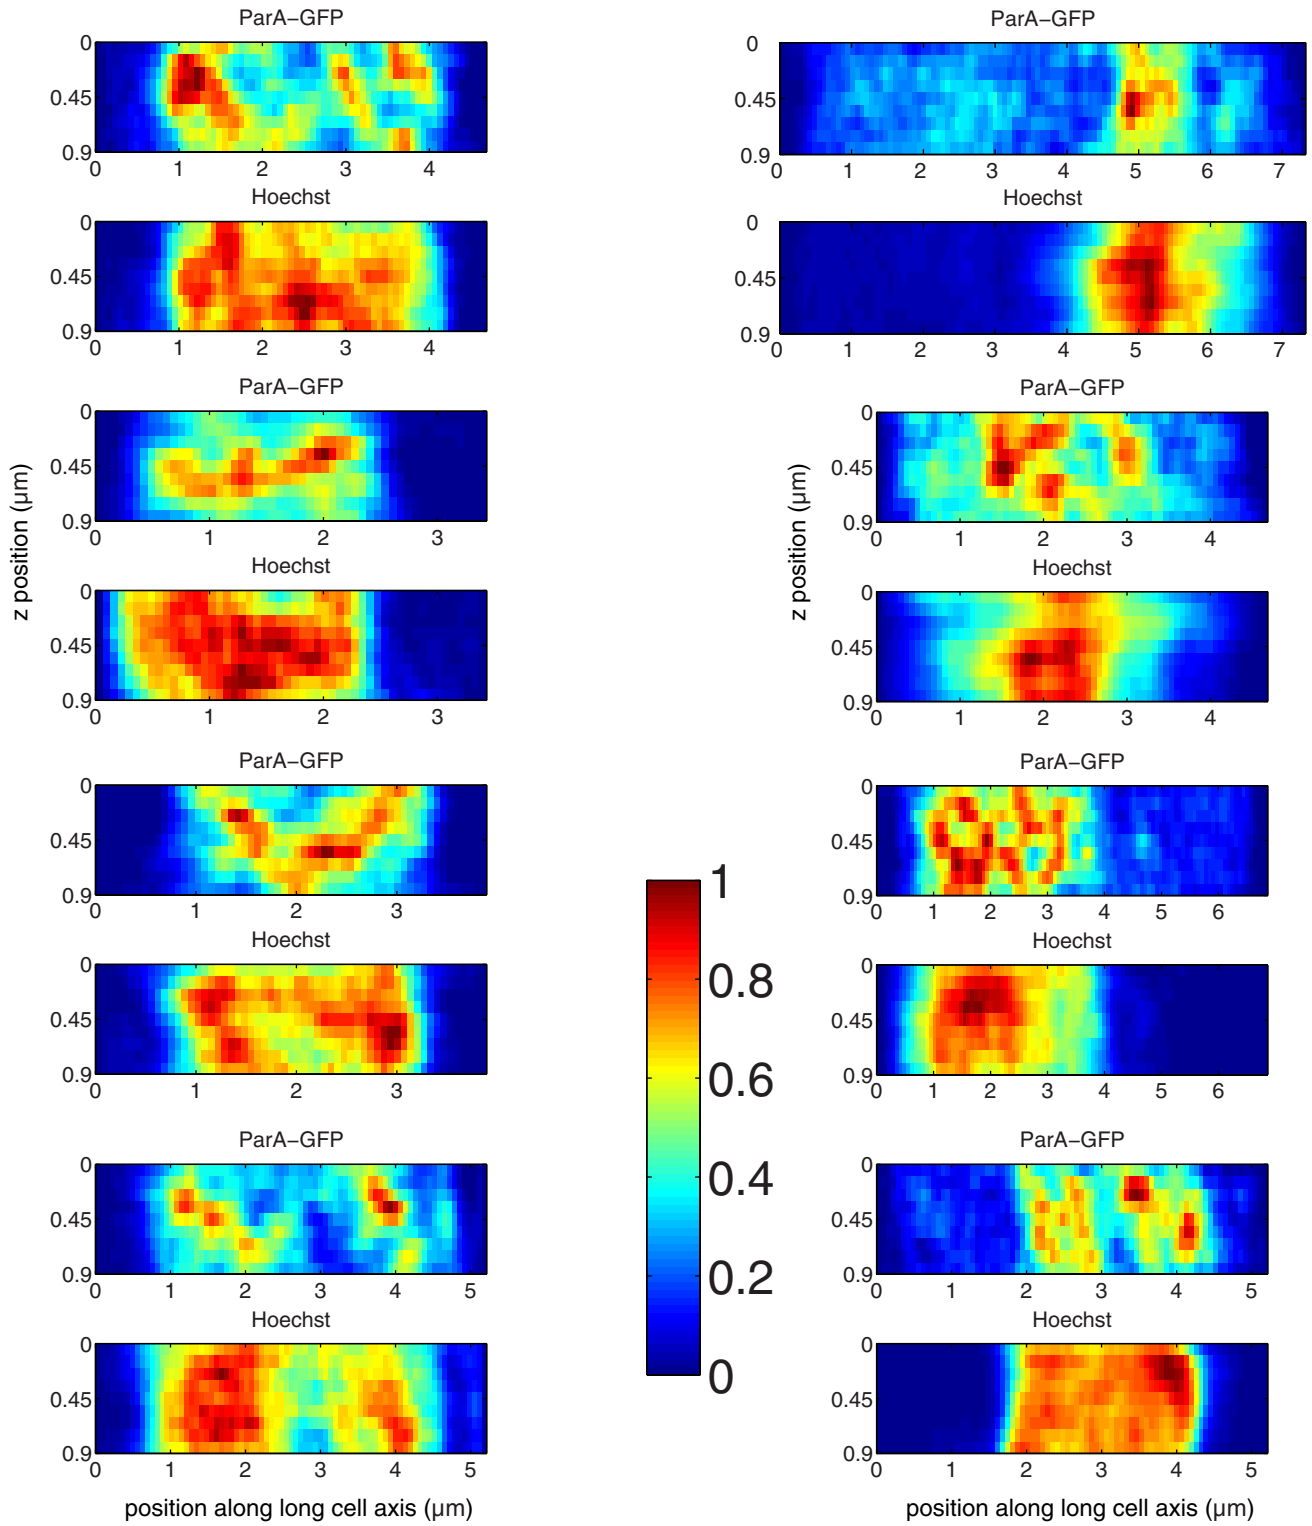**B.****WT****Nal**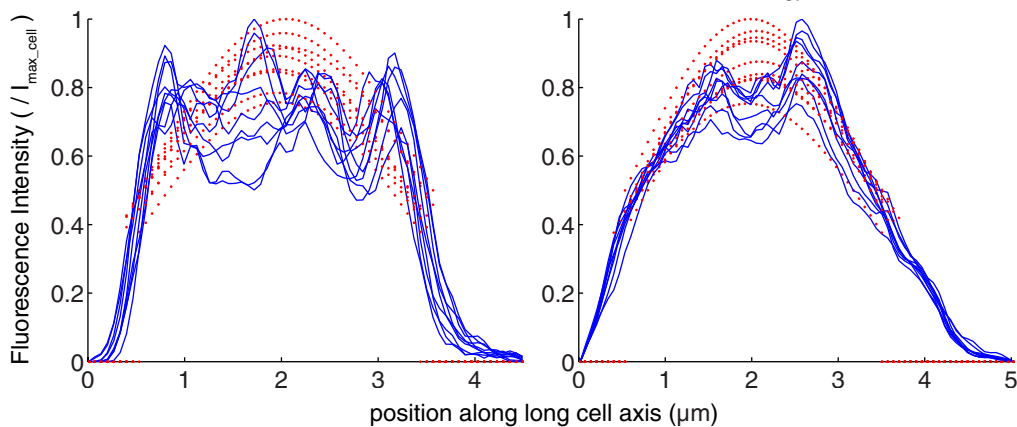

Supplement: pcbi.1004009.s006.pdf [file pcbi.1004009.s006.pdf]
